# Supplementary material
Source: PubMed Central journal article supplement (PMC6403492)
Supplement: mmc1.pdf [file mmc1.pdf]

YMTHE, Volume 27

## **Supplemental Information**

**miR-221/222-Mediated Inhibition of Autophagy**

**Promotes Dexamethasone Resistance**

**in Multiple Myeloma**

**Jian Xu, Yan Su, Aoshuang Xu, Fengjuan Fan, Shidai Mu, Lei Chen, Zhangbo Chu, Bo Zhang, Haifan Huang, Jiasi Zhang, Jun Deng, Lisha Ai, Chunyan Sun, and Yu Hu**

## Supplemental Information

Figure S1

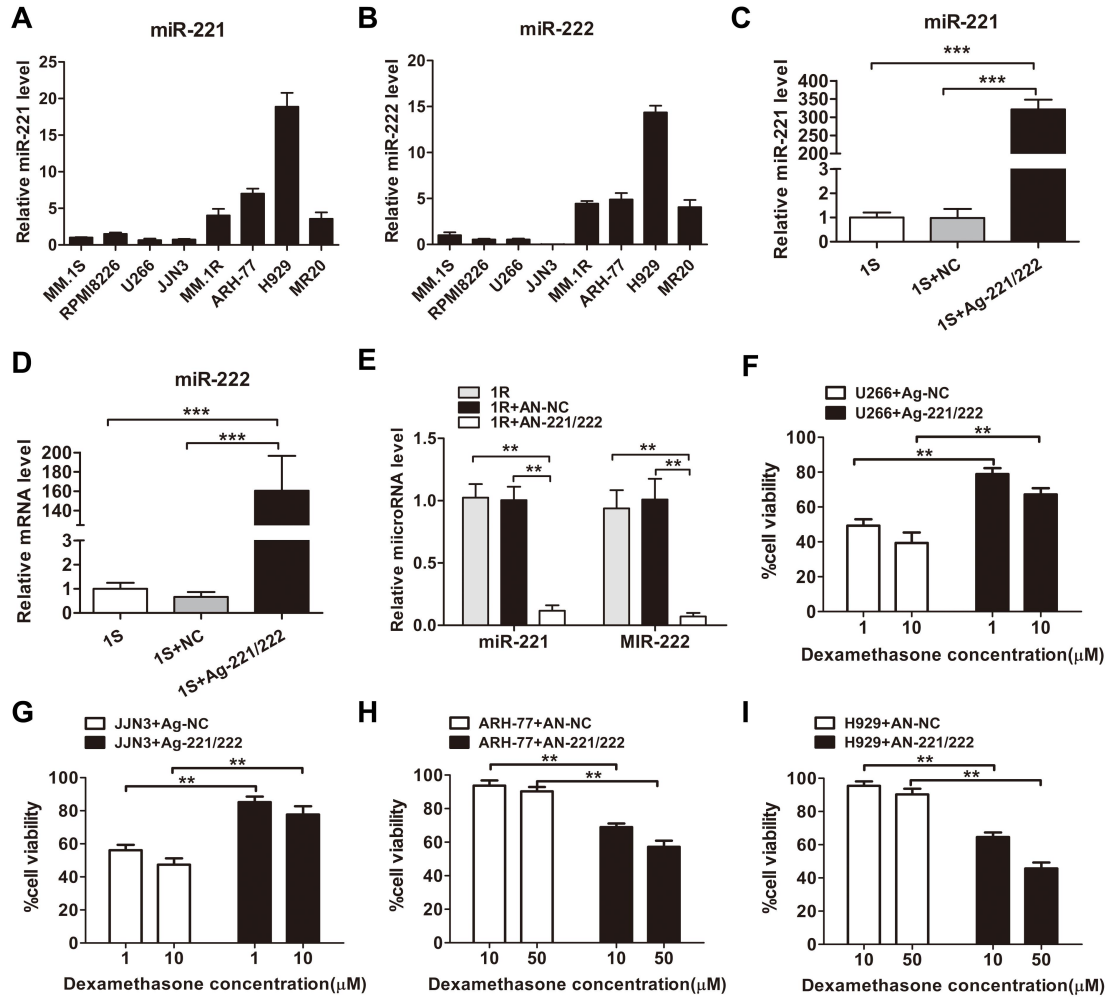

**Figure S1. Expression levels of miR-221 and miR-222 in MM cell lines.**

(A-B) qRT-PCR analysis of miR-221 and miR-222 expression levels in MM cell lines. (C-D) qRT-PCR analysis of miR-221 and miR-222 expression levels in MM.1S cells 48 h after transfection with agomir-NC (1S+NC) or agomir-221/222 (1S+Ag-221/222). Nontransfected (1S) MM cells were used as controls. \*\*\*  $p < 0.001$ . (E) qRT-PCR analysis of miR-221 and miR-222 expression levels in MM.1R cells transfected with antagomir-NC (AN-NC) or antagomir-221/222 (AN-221/222) for 48 h. Nontransfected MM.1R cells (1R) were used as controls. \*\*  $p < 0.01$ . (F-I) U266 and JLN3 cells were transfected with 100 nM of agomir-221/222 (Ag-221/222) or agomir-NC (Ag-NC). ARH-77 and H929 cells were transfected with 200 nM of antagomir-221/222 (AN-221/222) or antagomir-NC (AN-NC). Then the cells were treated with Dex at the indicated concentrations. After 48 h, cell viability was measured using CCK-8 assay. Data were shown as mean  $\pm$  SD from three independent experiments. \*\*  $p < 0.01$ .

Figure S2

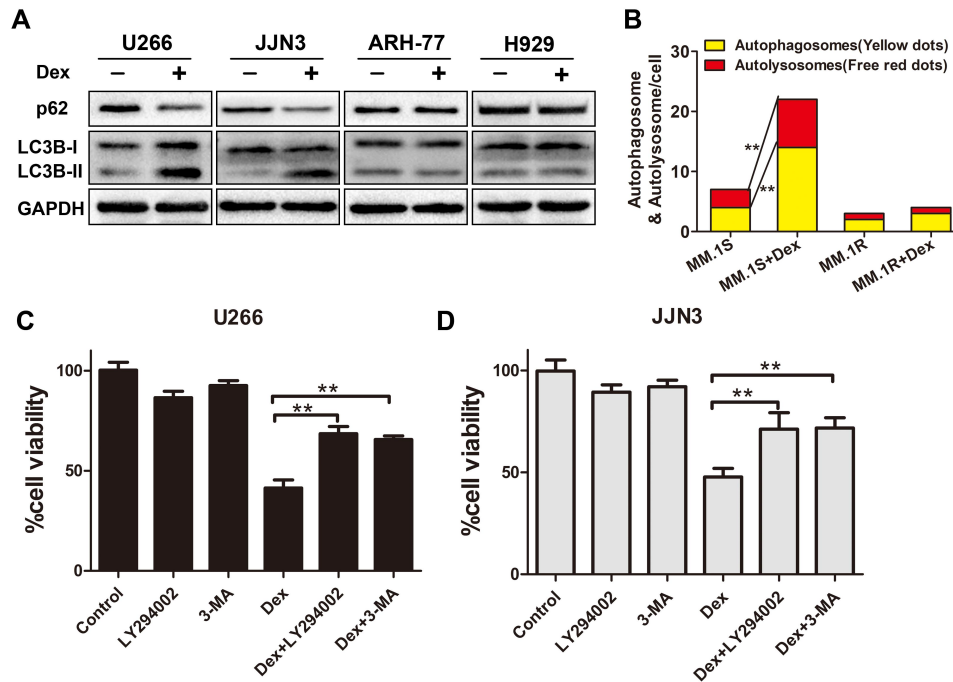

**Figure S2. Dex induces pro-death autophagy in MM cells.**

(A) Western blot analysis of p62 and LC3B expression in U266, JJN3, ARH-77 and H929 cells after treatment with Dex for 24 h. (B) MM.1S and MM.1R cells expressing GFP-mCherry-LC3 fusion protein were treated with Dex for 24 h. The mean number of autophagosomes and autolysosomes per cell is represented by yellow and red, respectively. \*\*  $p < 0.01$ . (C-D) Cell viability of U266 and JJN3 cells pretreated with autophagy inhibitor 3-MA or Ly294002 for 2h followed by Dex (10  $\mu$ M) for 48 h was assessed using CCK-8 assay. \*\*  $p < 0.01$ .

**Figure S3**

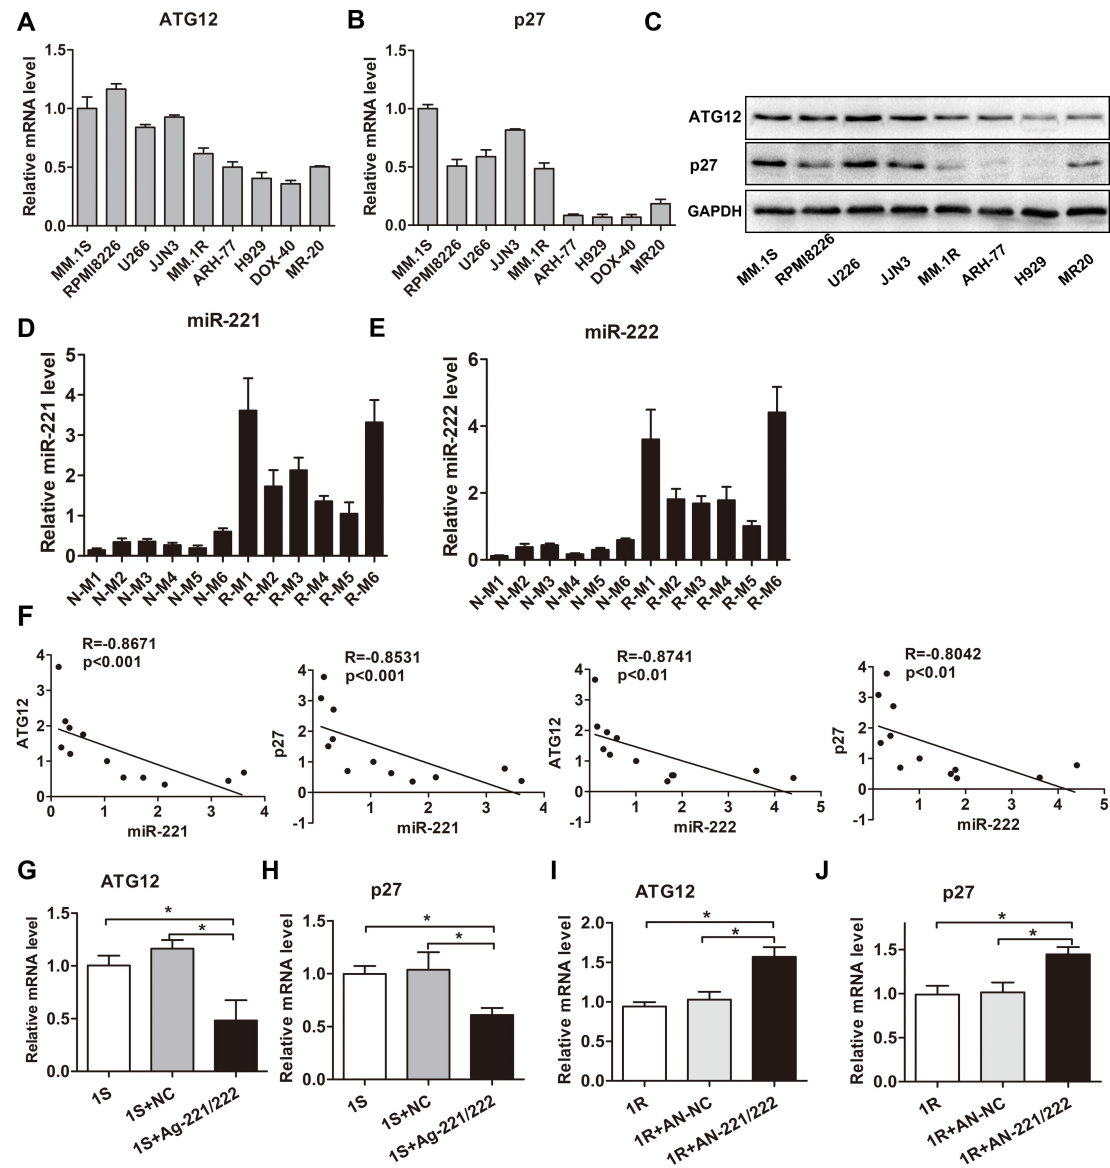

**Figure S3. miR-221/222 regulate the expression levels of ATG12 and p27 in MM cells.**

(A-C) qRT-PCR and western blot analysis of ATG12 and p27 expression levels in MM cell lines. (D, E) qRT-PCR analysis of miR-221 and miR-222 expression levels in plasma cells (PCs) from patients with newly diagnosed MM (N-M) and patients with relapsed/refractory MM (R-M). (F) Correlations of miR-221 and miR-222 expression levels with ATG12 and p27 mRNA levels in MM patients were analyzed by way of Spearman correlation test. (G, H) qRT-PCR analysis of ATG12 and p27 mRNA levels in MM.1S cells transfected with agomir-NC (NC) or agomir-221/222 (Ag-221/222). (I, J) qRT-PCR analysis of relative mRNA levels of ATG12 and p27 in MM.1R cells transfected with antagomir-NC (AN-NC) or antagomir-221/222 (AN-221/222). \*  $p < 0.05$

**Figure S4**

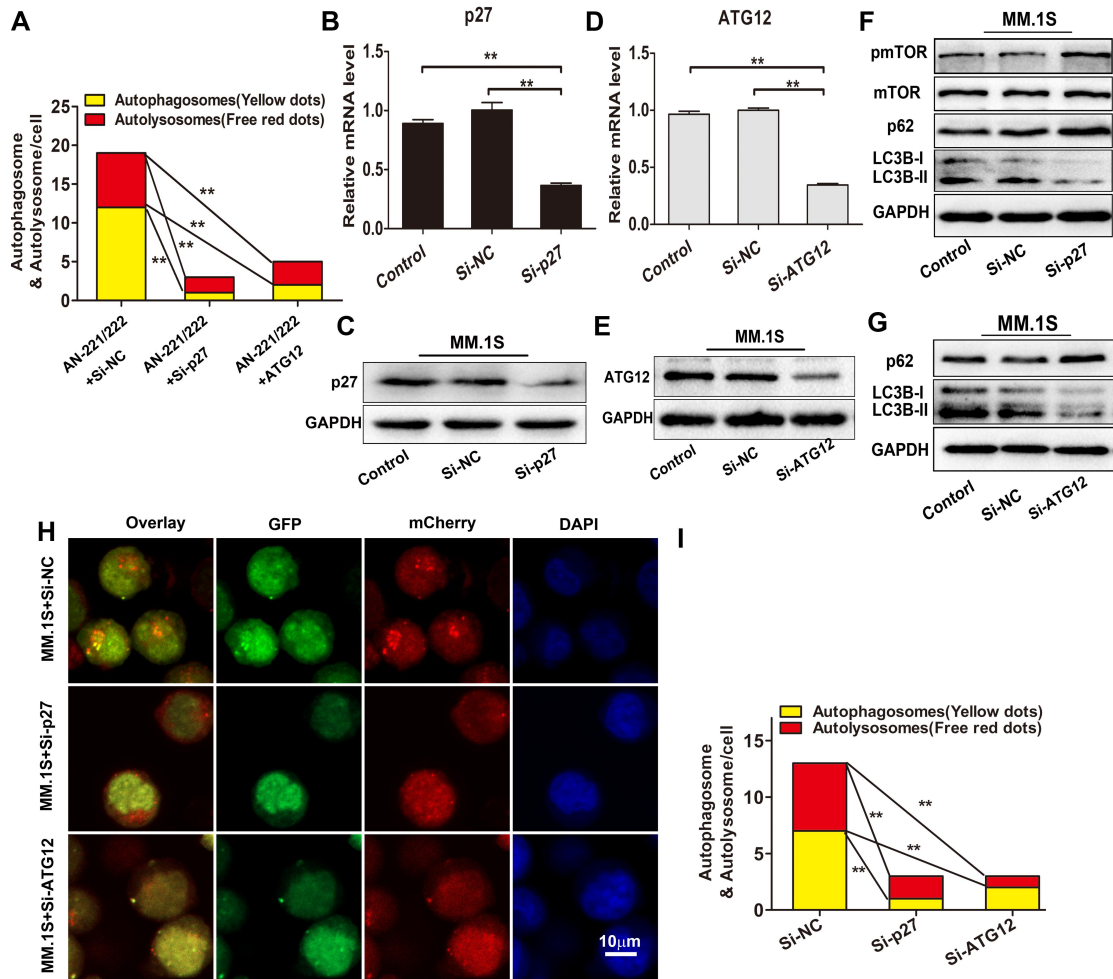

**Figure S4. Knockdown of ATG12 or p27 decreases autophagy in MM cells.**

(A) MM.1R cells expressing GFP-mCherry-LC3 fusion protein were co-transfected with antagomir-221/222 and siRNAs targeting ATG12 or p27 for 48 h. The mean number of autophagosomes and autolysosomes per MM.1R cell is represented by yellow and red, respectively.  $**p < 0.01$ . (B-E) qRT-PCR and western blot analysis of ATG12 and p27 expression levels in MM.1S cells transfected with siRNA targeting ATG12 or p27.  $**p < 0.01$ . (F, G) Western blot analysis of pmTOR, mTOR, LC3B and p62 protein expression in MM.1S cells transfected with p27 siRNA, ATG12 siRNA or siRNA-NC for 72 h. (H) Representative confocal images of MM.1S cells expressing GFP-mCherry-LC3 fusion protein and transfected with p27 siRNA, ATG12 siRNA or siRNA-NC for 48 h. (I) The mean number of autophagosomes and autolysosomes per MM.1S cell is represented by yellow and red, respectively.  $**p < 0.01$ .

**Figure S5**

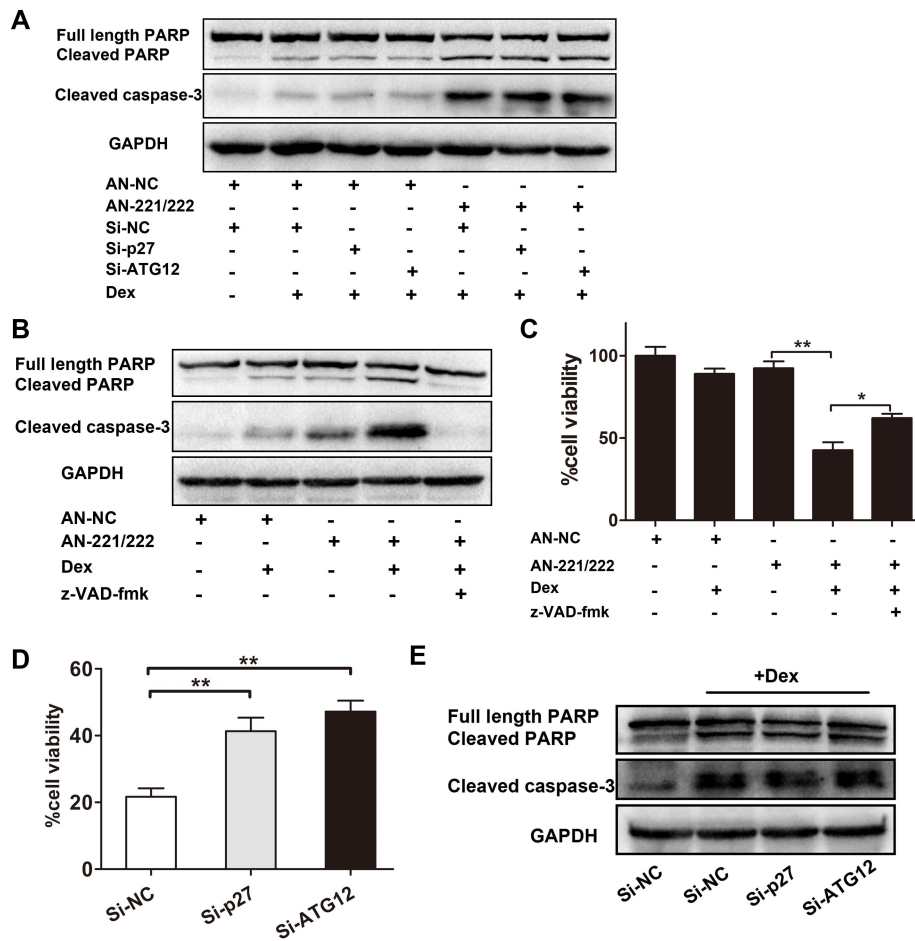

**Figure S5. Knockdown of ATG12 or p27 inhibits Dex-induced autophagic cell death in MM cells.**

(A) MM.1R cells co-transfected with antagomir-221/222 or antagomir-NC and siRNA targeting ATG12 or p27 were treated with Dex (50  $\mu$ M) for 48 h. Apoptosis was examined by detecting cleavage of caspase-3 and PARP using western blot analysis. (B-C) MM.1R cells transfected with antagomir-NC or antagomir-221/222 were pretreated with pan-caspase inhibitor z-VAD-fmk (50  $\mu$ M) for 2 h followed by Dex (50  $\mu$ M) for 48 h. Apoptosis was examined by detecting cleavage of caspase-3 and PARP with western blot analysis (B) and cell viability was assessed using CCK-8 assay (C). (D-E) MM.1S cells transfected with siRNA targeting p27 or ATG12 were treated with Dex (1  $\mu$ M). After 48 h, cell viability was evaluated using CCK-8 assay (D) and apoptosis was examined by detecting cleavage of caspase-3 and PARP using western blotting (E). \*  $p < 0.05$ , \*\*  $p < 0.01$ .

**Figure S6**

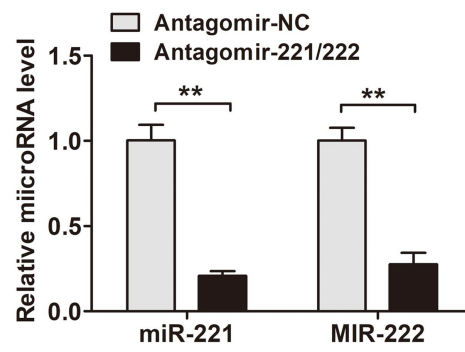

**Figure S6.** qRT-PCR analysis of miR-221 and miR-222 expression levels in tumor tissues from MM.1R-xenografted mice treated with antagomir-NC and antagomir-221/222.  $**p < 0.01$ .

**Table S1. Clinical information of healthy donors and MM patients .**

|                               | Number | Gender,<br>Male/Female | Age,<br>median<br>(range)<br>years | Isotype                                                                                 | International<br>Staging System<br>(ISS) stage |
|-------------------------------|--------|------------------------|------------------------------------|-----------------------------------------------------------------------------------------|------------------------------------------------|
| Healthy donor                 | 11     | 7/4                    | 57<br>(37-70)                      | -                                                                                       | -                                              |
| Newly diagnosed MM            | 20     | 14/6                   | 59<br>(45-76)                      | 11 IgG Kappa<br>3 IgG Lambda<br>2 IgA Kappa<br>2 IgA Lambda<br>1 IgD Lambda<br>1 Lambda | ISS I: 2<br>ISS II: 7<br>ISS III: 11           |
| Relapsed/<br>Refractory<br>MM | 21     | 15/6                   | 60<br>(42-80)                      | 10 IgG Kappa<br>2 IgG Lambda<br>4 IgA Kappa<br>3 IgA Lambda<br>2 IgD Lambda             | ISS I: 2<br>ISS II: 6<br>ISS III: 13           |

**Table S2. Dex sensitivity of MM cell lines.**

| MM cell lines | IC50 (mean±SD)   | Dex sensitivity |
|---------------|------------------|-----------------|
| MM.1S         | 0.091 ± 0.02 µM  | Sensitive       |
| U266          | 2.02 ± 0.504 µM  | Sensitive       |
| JJN3          | 4.021 ± 0.602 µM | Sensitive       |
| RPMI 8226     | 14.96 ± 1.873 µM | Sensitive       |
| H929          | >500 µM          | Resistant       |
| MR20          | >500 µM          | Resistant       |
| MM.1R         | >500 µM          | Resistant       |
| ARH-77        | >500 µM          | Resistant       |

MM Cells were seeded in 96-well plates ( $3 \times 10^4$  cells/well) in the presence of different concentrations of Dex. After 48 h, CCK-8 assay was performed. The concentration at which Dex produced IC50 was then calculated. Dex sensitivity was defined as follow: sensitive, IC50 < 50 µM.

**Table S3. Primers for qRT-PCR used in this study.**

| Prime name    | Sequence                      |
|---------------|-------------------------------|
| ATG12 forward | 5'-CCACTGAGGGTTCAGATGATAGA-3' |
| ATG12 reverse | 5'-TGGGCAACAAGACCGAAAC-3'     |
| p27 forward   | 5'-GCAGGAGAGCCAGGATGTCAG-3'   |
| p27 reverse   | 5'-TGCGTGTCTCAGAGTTAGCC-3'    |
| GAPDH forward | 5'-GGTGAAGGTCGGAGTCAACGG-3'   |
| GAPDH reverse | 5'-CCTGGAAGATGGTGTGGGATT-3'   |



**Table S4. siRNA sequences of genes used in this study.**

| Target name  | Sequence                        |
|--------------|---------------------------------|
| Si-ATG12-001 | 5'-AGAAGTTGGA ACTCTCTAT-3'      |
| Si-ATG12-002 | 5'-GGGATGAACCACAAAGAAA-3'       |
| Si-ATG12-003 | 5'-AAGTGGGCAGTAGAGCGAACACGAA-3' |
| Si-P27-001   | 5'-GGAGCAATGCGCAGGAATA-3'       |
| Si-P27-002   | 5'-GCAAGTACGAGTGGCAAGA-3'       |
| Si-P27-003   | 5'-GCACTGCAGAGACATGGAA-3'       |
| Si-NC        | 5'-TTCTCCGAACGTGTCACGT-3'       |
